# Supplementary material for: WRF-Chem simulation of aerosol seasonal variability in the San Joaquin Valley
Source: Copernicus journal article supplement (doi:10.5194/acp-2016-981), 2016-11-29
Supplement: Supplementary file 1 [file acp-2016-981-supplement.pdf]

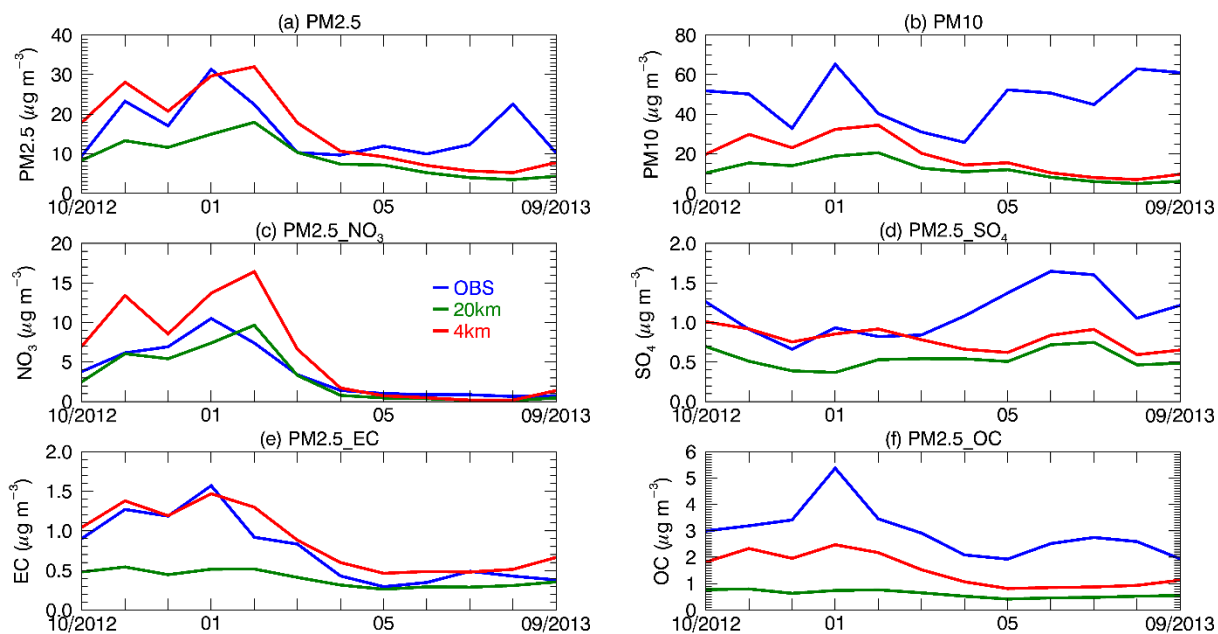

- 1
- 2 Supplementary Figure 1. Aerosol mass ( $\mu\text{g m}^{-3}$ ) for different species from EPA CSN (OBS), 20km
- 3 and 4km simulations at Bakersfield, CA. PM2.5\_NO<sub>3</sub> represents NO<sub>3</sub> with diameter  $\leq 2.5 \mu\text{m}$ .
- 4 Similar definition for SO<sub>4</sub>, EC and OC in the figures.

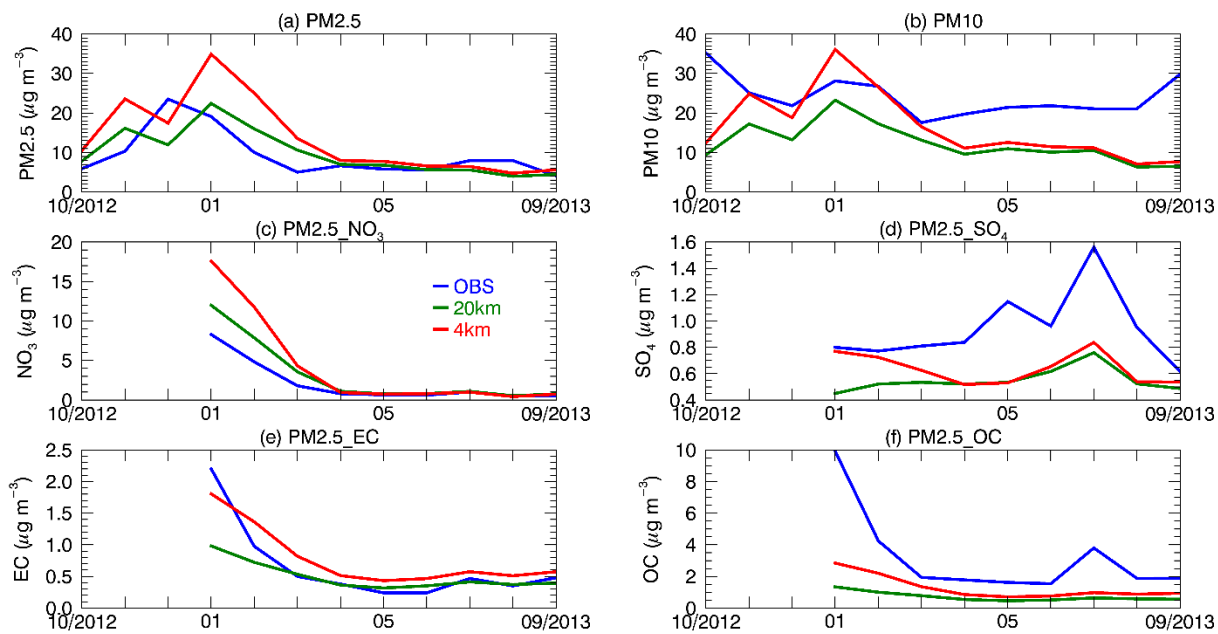

5

6 Supplementary Figure 2. Aerosol mass ( $\mu\text{g m}^{-3}$ ) for different species from EPA CSN (OBS), 20km  
 7 and 4km simulations at Modesto, CA.
